# Supplementary material for: Biofilm Formation by Escherichia coli Isolated from Urinary Tract Infections from Aguascalientes, Mexico
Source: MDPI journal article supplement (doi:10.3390/microorganisms11122858), 2023-11-25
Supplement: s1 [file s1]

**Supplementary Table S1.** Oligonucleotides and PCR conditions used in this study.

| Target gene    | Sequence                                                                 | Amplification size (pb) | PCR condition                                                                                                                 | Ref.    |
|----------------|--------------------------------------------------------------------------|-------------------------|-------------------------------------------------------------------------------------------------------------------------------|---------|
| <i>uidA</i>    | F: 5'-AATGTGCTGTGCCTGAACC-3'<br>R: 5'-ATTGTTTGCCTCCCTGCTG-3'             | 450                     | 94°C 5 minutes; 30 cycles of 94°C for 30 seg, 54°C for 30 seg, 72°C for 30 seg; final extension 72°C for 7 min.               | [43]    |
| <i>agn43</i>   | F: 5'-TTCCGGAAGACGGTGAA-3'<br>R: 5'-TTCTGGGTGAGTGTGGTGTG-3'              | 144                     | 94°C 5 minutes; 30 cycles of 94°C for 30 seg, 56°C for 30 seg, 72°C for 30 seg and; a final extension 72°C for 7 min.         | [49]    |
| <i>afa/dra</i> | F: 5'-GGCAGAGGGCCGCAACAGGC-3'<br>R: 5'-CCCGTAACGCGCCAGCATCTC-3'          | 592                     | 94°C for 5 minutes; 30 cycles of 94°C for 30 seg, 63°C for 45 seg, 72°C for 45 seg and; a final extension 72°C for 7 min.     | [45]    |
| <i>papC</i>    | F: 5'-GACGGCTGTACTGCAGGGTGTGGCG-3'<br>R: 5'-ATATCCTTCTGCAGGGATGCAATA-3'  | 350                     |                                                                                                                               | [45]    |
| <i>hlyA</i>    | F: 5'-AACAAGGATAAGCACTGTTCTGGCT-3'<br>R: 5'-ACCATATAAGCGGTCATTCCCGTCA-3' | 1117                    | 94°C for 10 minutes; 30 cycles of 94°C for 30 seg, 56°C for 1.5 min, 72°C for 1.5 min and; a final extension 72°C for 10 min. | [47,48] |
| <i>cnf1</i>    | F: 5'-AAGATGGAGTTTCTATGCAGGAG-3'<br>R: 5'-CATTCAGAGTCCTGCCCTCATTATT-3'   | 498                     |                                                                                                                               | [45]    |
| <i>sfaS</i>    | F: 5'-GTGGATACGACGATTACTGTG-3'<br>R: 5'-CCGCCAGCATTCCCTGTATTC-3'         | 240                     |                                                                                                                               |         |
| <i>fimH</i>    | F: 5'-TGCAGAACGGATAAGCCGTGG-3'<br>R: 5'-GCAGTCACCTGCCCTCCGGTA-3'         | 508                     | 94°C for 10 minutes; 30 cycles of 94°C for 30 seg, 54°C for 1 min, 72°C for 1 min and; a final extension 72°C for 10 min.     | [45]    |
| <i>kpsMTII</i> | F: 5'-GCGCATTGCTGATACTGTTG-3'<br>R: 5'-CATCCAGACGATAAGCATGAGCA-3'        | 272                     |                                                                                                                               |         |
| <i>fyuA</i>    | F: 5'-TGATTAACCCCGCGACGGGAA-3'<br>R: 5'-CGCAGTAGGCACGATGTTGTA-3'         | 880                     |                                                                                                                               | [45]    |
| <i>yfcV</i>    | F: 5'-ACATGGAGACCACGTTACAC-3'<br>R: 5'-GTAATCTGGAATGTGGTCAGG-3'          | 292                     | 94°C for 15 minutes; 30 cycles of 94°C for 30 seg, 63°C for 1.5 min, 72°C for 1.5 min and; a final extension 72°C for 10 min. | [46]    |
| <i>vat</i>     | F: 5'-TCAGGACACGTTACGGCATTACGT-3'<br>R: 5'-GGCCAGAACATTTGCTCCCTTGTT-3'   | 550                     |                                                                                                                               | [46]    |

Single and multiplex PCR were used in order to detect virulence genes. Genes tested are listed following the singleplex or multiplex PCR used in the study.

**Supplementary Table S2.** Function of virulence markers for UPEC tested in this study.

| VF type            | Target gene    | Name                                                     | Function                                                                                                                                                                                                                                                                                                                                           | Ref.       |
|--------------------|----------------|----------------------------------------------------------|----------------------------------------------------------------------------------------------------------------------------------------------------------------------------------------------------------------------------------------------------------------------------------------------------------------------------------------------------|------------|
| Adhesins           | <i>fimH</i>    | D-mannose specific subunit, FimH, type 1 fimbriae        | Participate in UPEC adherence, colonization and invasion of the bladder epithelium which is critical for lower UTIs. Binds mannosylated glycoproteins on superficial epithelial cells in the bladder. Facilitates the biofilm formation. Also mediate binding to the intestinal crypts, helping to establish a stable gastrointestinal reservoir.  | [5,31, 43] |
|                    | <i>papC</i>    | P fimbriae chaperone                                     | Stimulate the production of cytokines by T lymphocytes and is a colonization factor highly expressed in pyelonephritis in order to attach to digalactoside receptor that are expressed on the kidney epithelium. Pili bind globosides in the kidney and are essential for progression to pyelonephritis.                                           | [5,50-52]  |
|                    | <i>yfcV</i>    | Major subunit of a putative chaperone-usher fimbriae     | Related to more efficiently colonization of urinary tract.                                                                                                                                                                                                                                                                                         | [46]       |
|                    | <i>agn43</i>   | Phase-variable outer membrane protein adhesin antigen 43 | Adhesin of the autotransporter (AT) family. Mediates cell aggregation, adhesion, biofilm aggregation and IBCs formation and, enhancing colonization and persistence in the urinary bladder.                                                                                                                                                        | [6,49]     |
|                    | <i>afa/dra</i> | Dr-binding adhesins                                      | Afa is a non-fibrous adhesin binds to the decay-accelerating factor (DAF) receptor on the cell surface epithelium and is related to hemagglutination capacity. <i>dra</i> encodes the Dr fimbriae that has the function to binding to the DAF receptor on the surface epithelial cells and mediate the internalization bacteria to the host cells. | [52]       |
| Toxins             | <i>sfaS</i>    | Pilus tip adhesin, S fimbriae                            | Participate in the adhesion to intestinal epithelial cells, kidney and lower urinary tract cells. Facilitate the penetration of bacteria into the tissues.                                                                                                                                                                                         | [52]       |
|                    | <i>hlyA</i>    | $\alpha$ -haemolysin                                     | Damage the renal epithelium by formation of pores. Contribute to activation of the host inflammasome by activating caspase 1 and 4, leading to urothelial cell death.                                                                                                                                                                              | [5,50]     |
|                    | <i>cnf1</i>    | Cytotoxic necrotizing factor 1                           | Contribute to the inflammation and tissue damage.                                                                                                                                                                                                                                                                                                  | [45]       |
|                    | <i>vat</i>     | Autotransporter serine protease toxin                    | Vat induced vacuole formation on the urothelium model, cellular damage and change in the cytoskeletal including distribution of F-actin and tubulin.                                                                                                                                                                                               | [52,51]    |
| Siderophores       | <i>fyuA</i>    | Yersiniabactin receptor                                  | Outer membrane-protein receptor for internalization. Associated with UPEC virulence in the bladder. Required for the establishment of septicemia.                                                                                                                                                                                                  | [46,50]    |
| Capsular synthesis | <i>kpsMTII</i> | Group II capsular polysaccharide synthesis               | Protection factor against phagocytosis.                                                                                                                                                                                                                                                                                                            | [45-46]    |

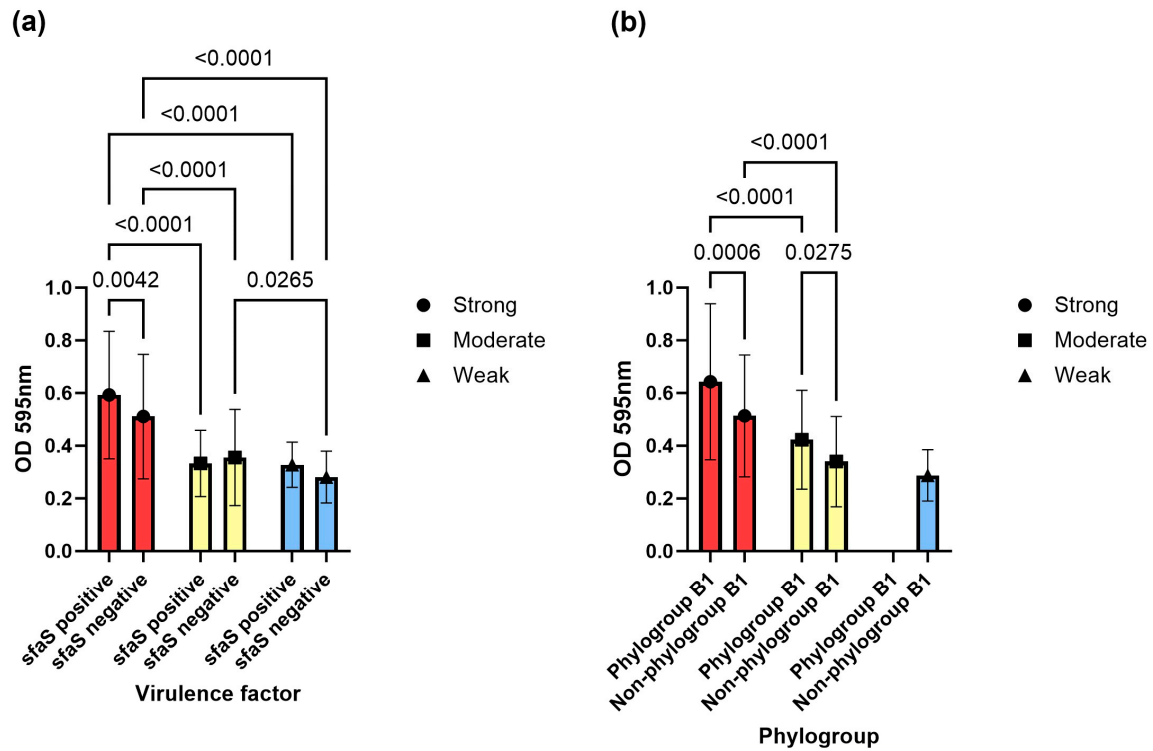

**Supplementary Figure S1.** Comparison among optical densities (OD) among strong, moderate and weak biofilm formation in strains positive and negative for (a) *sfaS* gene and (b) phylogroup B1. Comparison among optical densities of strong-, moderate-, and weak-biofilm-producing strains was performed using the non-parametric two-way analysis of variance (ANOVA) with a Tukey's multiple comparisons post-hoc test.
